# Supplementary material for: Application of metagenomic next-generation sequencing technology in hematologic malignancy patients with sepsis following antibiotic use
Source: Research Square preprint supplement (doi:10.21203/rs.3.rs-7345606/v1), 2025-09-25
Supplement: Supplementary file 1 [file 5f4b419e3659e8bbf9e788b7.docx]

Table S2 Changes in patient indicators within the subsequent 7 days after optimizing anti-infective treatment.

|  | Improvement | No improvement |
| --- | --- | --- |
| White blood cell (109/L) | 69 (57.98%) | 50 (42.01%) |
| C reactive protein (mg/L) | 72 (60.50%) | 47 (39.49%) |
| Procalcitonin (ng/mL) | 87 (73.10%) | 32 (26.89%) |
| Septic shock | 12 (40.00%) | 18 (60.00%) |
| Febrile symptoms | 99 (83.19%) | 20 (16.80%) |
