# Supplementary material for: Application of metagenomic next-generation sequencing technology in hematologic malignancy patients with sepsis following antibiotic use
Source: Research Square preprint supplement (doi:10.21203/rs.3.rs-7345606/v1), 2025-09-25
Supplement: Supplementary file 2 [file 6e3f21080081c0064827fe82.docx]

Table S1 Clinical impact of mNGS results on anti-infective treatment.

| **Treatment changes owing to mNGS results** | **No. (%)** |
| --- | --- |
| **No changs** |  |
| Empirical antibiotic treatment continued | 18 (15.12%) |
| **Treatment changes** |  |
| Add antibiotics on the basis of the original | 21 (17.64%) |
| Adjust antibiotics on the basis of the original | 47 (39.49%) |
| Reduce antibiotics on the basis of the original | 33 (27.73%) |
